# 1 Multiscale light-sheet organoid imaging framework

2 Gustavo de Medeiros<sup>1</sup>, Raphael Ortiz<sup>1,2</sup>, Petr Strnad<sup>1,3</sup>, Andrea Boni<sup>1,3</sup>, Franziska Moos<sup>1</sup>, Nicole  
3 Repina<sup>1</sup>, Ludivine Chalet Meylan<sup>1</sup>, Francisca Maurer<sup>1</sup> and Prisca Liberali<sup>1,4,\*</sup>

4 <sup>1</sup>Friedrich Miescher Institute for Biomedical Research (FMI) Maulbeerstrasse 66, 4058 Basel.

5 <sup>2</sup>Current address: Disney Research Studios, Stampfenbachstrasse 48, 8006 Zürich

6 <sup>3</sup>Current address: Viventis Microscopy Sàrl, EPFL Innovation Park, Building C, 1015 Lausanne.

7 <sup>4</sup>University of Basel, Basel, Switzerland

8 \*Correspondence should be addressed to P.L. ([prisca.liberali@fmi.ch](mailto:prisca.liberali@fmi.ch))

9

10

## 11 Abstract

12 Organoids provide an accessible *in-vitro* system to mimic the dynamics of tissue regeneration  
13 and development. However, long-term live-imaging of organoids remains challenging. Here  
14 we present an experimental and image-processing framework capable of turning long-term  
15 light-sheet imaging of intestinal organoids into digital organoids. The framework combines  
16 specific imaging optimization combined with data processing via deep learning techniques to  
17 segment single organoids, their lumen, cells and nuclei in 3D over long periods of time. By  
18 linking lineage trees with corresponding 3D segmentation meshes for each organoid, the  
19 extracted information is visualized using a web-based “Digital Organoid Viewer” tool allowing  
20 unique understanding of the multivariate and multiscale data. We also show backtracking of  
21 cells of interest, providing detailed information about their history within entire organoid  
22 contexts. Furthermore, we show cytokinesis failure of regenerative cells and that these cells  
23 never reside in the intestinal crypt, hinting at a tissue scale control on cellular fidelity.

24

## 25 Introduction

26 During adult life, organs such as the intestine are challenged to diverse environmental  
27 conditions, requiring the tissue to be robust and yet plastic. For instance, during regeneration  
28 after damage, surviving cells need to carefully orchestrate a fast and robust regrowth process  
29 in coordination with proper shape recovery as well as functional and morphological  
30 remodeling. To best overcome the difficulties surrounding the study of these tissue dynamics  
31 in inner organs *in vivo*, organoids have become a powerful experimental method owing to  
32 their exceptional accessibility and manipulability<sup>1-3</sup>. For the case of the intestinal tract,  
33 intestinal organoids grown from single cells functionally recapitulate both the regenerative  
34 response of the intestinal epithelium as well as the homeostasis of the *in vivo* intestine<sup>4</sup>.  
35 Morphologically, they also recapitulate the main dynamics of crypt formation, making them  
36 a unique *in vitro* system<sup>5,6,7,8</sup>.

37 Although with high degree of accessibility, performing live imaging of organoid growth  
38 remains a challenge, as it typically requires not only microscopy techniques capable of stable  
39 long-term imaging of several samples simultaneously, but also dedicated analysis and  
40 processing pipelines that can cope with complex imaging data. On the more technical imaging  
41 side, high-resolution multi-view light-sheet imaging has been used to track single cells in  
42 different embryo development settings<sup>9,10</sup>, at the cost of low throughput imaging (usually 1-  
43 5 samples per imaging experiment). This is detrimental since the efficiency of organoid  
44 formation from single cells is particularly low (around 15% in the case of murine intestinal  
45 organoids<sup>6</sup>). Furthermore, previous work on the live recording of organoid dynamics has  
46 focused either on specific biological questions<sup>6,8,11</sup>, organoid wide phenotype-driven  
47 screening approaches<sup>12-14</sup>, or on specific isolated tools<sup>15</sup> without a more generalised yet in-  
48 depth approach on light-sheet imaging and data analysis. In another work which aimed at  
49 creating a light-sheet organoid imaging platform<sup>16</sup> the focus was mainly on the determination  
50 of culture-wide heterogeneities through a combination of both light-sheet and wide-field  
51 techniques. Although showing organoid diversity within the same culture, in-depth cellular  
52 multi-scale analysis for each organoid remained lacking.

53 To bridge the gap and provide quantitative information on organoid growth dynamics with  
54 in-depth cellular analysis, we here provide a unified multiscale light-sheet imaging framework  
55 tailored to live organoid imaging. Our framework incorporates optimized imaging, pre-  
56 processing, semi-automated lineage tracking, segmentation and multivariate feature  
57 extraction pipelines which provide multiscale measurements from organoid to single cell  
58 levels. By focusing on the development of intestinal organoids, we show that this holistic set  
59 of tools allows the combination of whole organoid and single cell features to be analysed  
60 simultaneously, having both lineage tree as well as spatial segmentation information  
61 presented in a clear and unified way. We demonstrate that our pipeline is compatible with  
62 fixation and immunolabeling after live imaging by tracking back cells positive for specific  
63 markers and compare the history of these cells with all other cells in the organoid. To facilitate  
64 the usage of the analysis and visualization tools, we have combined them into a unified set of  
65 tools we call LSTree<sup>17</sup>, built on a Luigi workflow and dedicated notebooks, allowing the  
66 different steps to run in a modular way. Further, we use our framework to dissect previously  
67 unknown biological insights on the role of polyploidy during intestinal organoid growth, and  
68 we propose a tissue level check point for tissue integrity that could start explaining the  
69 interplay between regeneration and cancer.

70

## 71 **Results**

### 72 **Imaging framework for light-sheet microscopy of organoid growth**

73 We developed a multiscale imaging framework that comprehends acquisition, pre-  
74 processing, automated tracking, segmentation with further feature extraction as well as  
75 visualization dedicated for 3D live imaging (**Fig. 1a**). In this work, we applied our framework  
76 to live intestinal organoid light-sheet recordings performed with a dual-illumination inverted  
77 light-sheet<sup>6</sup> microscope, which utilizes a multi-positioning sample holder system (**Fig. 1b**). In  
78 order to image organoid development, we followed previously published protocols<sup>6</sup>, FACS  
79 sorting single cells (**Supplementary Figure 1a**) from mature organoids and mounting them as

80 5  $\mu$ L mix drops with Matrigel on top of a ca. 50  $\mu$ m thick fluorinated ethylene propylene (FEP)  
81 foil, which are then covered in medium (**Fig 1c** left and **Methods Section**). To stabilize the  
82 imaging, we patterned the FEP foil used for mounting in order to create small wells  
83 (**Supplementary Figure 1b-d, Supplementary Note 1**), allowing better control of the sample  
84 position within the holder, while improving reproducibility of experiments by preventing  
85 drops from being washed away during medium change of fixation procedures. As previously  
86 demonstrated, the microscope we utilized is capable of imaging live intestinal organoids for  
87 long periods of time<sup>6,8</sup>, as well as acquiring time-lapses of mouse embryonic and gastruloid  
88 development<sup>18,19</sup>. However, one important drawback of the system was that the alignment  
89 of the illumination beams is done only once, prior to the experiment and irrespective of the  
90 position of the sample in the dish or holder. Although sufficient in certain situations (e.g.  
91 mouse embryo imaging), imaging of samples embedded and distributed inside a gel suffer  
92 from refractive index mismatch between water and Matrigel, as well as from the presence of  
93 other obstacles in the light-path (other organoids or debris) and from the curved shape of the  
94 sample holder itself. Therefore, to improve recording conditions in every individual sample,  
95 we developed a position dependent illumination alignment step. This allows to fine tune the  
96 alignment of each of the illumination sheets in respect to the detection plane for every sample  
97 position so that best image quality possible can be achieved throughout (**Fig 1b** right and  
98 **Supplementary Note 1**).

99 To minimize storage needs and improve SNR, acquired images are cropped using a dedicated  
100 tool that automatically corrects for 3D sample drifting (**Fig 1d** upper row). The cropped  
101 images may also be further pre-processed through denoising and deconvolution steps.  
102 Denoising is performed using the Noise2Void scheme<sup>20</sup>, with its output sent to a tensor-flow  
103 based image deconvolution<sup>21</sup> (**Fig 1d** lower row) using measured PSFs from beads  
104 (**Supplementary Note 2 and Methods Section**).

105 With these first modules at hand, we imaged organoids expressing Histone 2B and mem9  
106 membrane peptide tagged with mCherry and GFP respectively, recording the growth and  
107 development of several organoids starting from single cells or 4-cell spheres (**Fig 1e** and  
108 **Supplementary Movie 1**) every 10 minutes throughout the course of around 4 days. The  
109 collected data comprised of organoids that form both budding and enterocyst phenotypes:  
110 whereas budding organoids grow from single cells into mature organoids with both crypt and  
111 villus structures, enterocysts, comprised of terminally differentiated enterocytes, do not have  
112 crypts as they do not develop Paneth cells required for the establishment of the stem cell  
113 niche, a necessary step for crypt formation<sup>6,8</sup>.

114 For the analysis, we initially performed single-cell partial semi-automatic tracking using the  
115 Fiji plugin Mastodon (<https://github.com/mastodon-sc/mastodon>) on 7 datasets. After that,  
116 we extracted features based on organoid and single cell segmentation and plotted this data  
117 over time (**Fig 1f** and **Supplementary Table 1**). For example, we noticed large variability in cell  
118 division synchronicity, as in some datasets the nuclei number growth over time loses the  
119 typical staircase-like behavior already early during the first day of recording. Although  
120 epithelium volume growth curves follow that of nuclei number, with the characteristic  
121 exponential behavior, nuclei density slightly increases over time. Mean cell volume showed  
122 characteristic mitotic peaks, with overall cell volume decrease over time, matching the  
123 increase in nuclei density. Interestingly, although initially cell to nuclei volume ratio vary, all  
124 datasets converge to common steady state values where the cell volume is ca. 3 to 4 times  
125 larger than the nuclear volume. We also observed a consistent change in organoid volume

126 due to medium change during the live recordings (**Supplementary Figure 2**). As this initial  
127 assessment of our imaging data showed consistent and reproducible results, and to handle  
128 larger dataset more rapidly and consistently, we developed an integrated and automated  
129 approach to turn the imaging into digital organoids with a visualization tool.

130

#### 131 [Dedicated image processing workflow](#)

132 To make the entire analysis and visualization tools directly accessible, we incorporated all  
133 image processing and data analysis modules into a unified workflow named LSTree, having  
134 most processing and training steps implemented using Luigi based tasks, and the rest as  
135 jupyter notebooks for cropping and segmentation evaluation. The workflow along with  
136 jupyter notebook and two example datasets are provided as a documented Github repository  
137 with step-by-step guide (see **Methods Section** and **Supplementary Notes 2-4** for more  
138 information).

139 In the first pre-processing step, the user selects which organoid needs to be cropped. This  
140 automatically generates minimal bounding boxes per time-point as well as global bounding  
141 box (**Fig 2a**). The workflow also has an interactive tool to review the crops and perform few  
142 manual corrections, e.g. to account for large displacement between consecutive frames  
143 (**Supplementary Figure 3**). Next, if needed, denoising and deconvolution of cropped and  
144 registered movies is performed as one combined step. Important to note that we chose to  
145 denoise and deconvolved our datasets as the image quality usually decays quite heavily at  
146 later timepoints. However, this is not a requirement, and the prediction models can also be  
147 trained based on good quality unprocessed datasets. More details on how to bypass the  
148 denoising and deconvolution steps are discussed through the example datasets provided in  
149 the GitHub documentation.

150 For the segmentation of organoids, as well as their cells and nuclei, we adopted different  
151 segmentation strategies all relying on existing convolutional neural networks (**Fig 2b**). Our  
152 main initial motivation was to test whether we could incorporate the spatial information from  
153 the lineage trees spots for training segmentation models. To that end, we decided to use the  
154 RDCNet instance segmentation network as a base<sup>22</sup>, taking advantage of its inherent recursive  
155 architecture. First, nuclei are segmented in 3D following a deep learning model trained with  
156 a mix of complete and partial annotations. A small subset of the frames is fully annotated by  
157 manually expanding the labels to the full nuclei, whereas partial annotations rely on the initial  
158 tracking performed with Mastodon by drawing spheres at the position of tracked nuclei. (**Fig**  
159 **2b** upper row). Jupyter notebooks for interactive visualization and correction of the predicted  
160 segmentation are also part of the framework and added onto the GitHub, which allows  
161 improving the model accuracy with minimal annotating time. To check whether this approach  
162 was valid, we compared the trained network output with randomly selected hand-annotated  
163 image volumes, yielding very good results (see **Supplementary Note 5** and **Supplementary**  
164 **Figure 4a-b**).

165 Motivated by the initial results with nuclei segmentation based on sparse annotations, we  
166 took a similar approach for cell segmentation. To this end, organoid and cell segmentation  
167 also use RDCNet and leverages the pre-computed nuclei segmentation to avoid manual  
168 annotations of individual cells. At the same time, we added a constraint based on lumen and  
169 epithelium segmentation, to avoid that cell labels spread outside of the epithelial layer. To  
170 subdivide the epithelium mask into cells, the previously segmented nuclei are used as partial

171 cell annotations under the assumption that they are randomly distributed within the cell  
172 compartment (**Fig 2b** lower row, **Supplementary Note 3**). Finally, in addition to the  
173 segmentation volumes and nuclei number (**Fig. 1e**), several different features are extracted  
174 such as nuclear distance to apical/basal membranes, fluorescence intensity, distance to  
175 parent node and number of neighbors per cell (For a complete list of features with short  
176 explanations see **Supplementary Table 1**).

177

### 178 [Deep learning model for automated lineage tracing](#)

179 Although suitable for estimating lineage trees for few datasets, semi-automated tracking of  
180 many datasets with the Mastodon Fiji plugin can be time consuming, as different datasets  
181 may require different setting parameters often break when cells are too packed or with low  
182 signal-to-noise. To significantly improve this process, we trained and refined a deep learning  
183 model on the available tracked datasets aiming at automatic generation of candidate trees  
184 that only require minimal corrections (**Fig 2c,d, Supplementary Note 3**). To avoid usage of  
185 tracing algorithms that enforce a complex set of rules<sup>23-25</sup>, we developed a joint  
186 segmentation-tracking approach that simultaneously predicts matching nuclei labels on 2  
187 consecutive frames. To this end, we extended the RDCNet instance segmentation model to  
188 predict pseudo 4D labels (3D convolutional network with time axis as an additional image  
189 channels) mapping correspondences between nuclei in 2 consecutive frames (**Fig 2c**).  
190 Predicting linked nuclei segmentations has the advantage to enforce constancy over the  
191 entire nuclear volume rather than relying on an ambiguous center, as well as implicitly  
192 enforcing rules such as minimum cell distance or plausible nuclei volume constraints in a data-  
193 driven manner. This method keeps the number of manual hyper-parameters tuning to a  
194 minimum and can be improved over time as more validated and corrected datasets are  
195 incorporated in the training set. In a complementary manner, this method can be used  
196 together with other deep learning strategies such as Elephant in a complementary and  
197 modular manner, in which curated trees via Elephant can be used for training of more  
198 generalized tracking models based on RDCNet, or even directly used for nuclei/cell  
199 segmentation training/prediction.

200 To assemble the predicted tree in the framework, nuclei labels in each frame are connected  
201 to their parents in the previous frame by finding the linking label with the maximum overlap  
202 (**Fig 2c, Supplementary Figure 5**). The predicted tree is then saved with the structure of a  
203 MaMuT.xml track file, which can be then imported into Mastodon for further correction if  
204 necessary (**Fig 2d**). As a direct consequence of the joint segmentation, additional information,  
205 such as the nuclei volume, can be overlaid on the predicted trees to aid in the curation process  
206 (**Supplementary Figure 5, Supplementary Note 3**). For instance, jumps in nuclear volume  
207 highlight positions where tracks should be merged or split. The manual curation time ranges  
208 from minutes to a couple hours on the most challenging datasets (e.g. low SNR images,  
209 abnormal nuclei shape). In summary, the here developed lineage tree prediction approach  
210 allows high quality prediction of intestinal organoid lineage trees with long tracks spanning  
211 multiple division cycles (up to 5 generations in this work) enabling tracked data to cross  
212 spatiotemporal scales. To further challenge our tracking prediction strategy, we have also  
213 tested it outside of our main focus on live imaging of intestinal organoid, and used trained  
214 models to validate prediction accuracy on mouse embryo datasets from published work  
215 (**Supplementary Figure 4c-e**, and discussions on **Supplementary Note 5**), also comparing it to

216 output from trained Elephant Tracker models (all trained models can be found in the  
217 **Supplementary Software**).

218

### 219 [Digital organoid viewer](#)

220 With the lineage trees and the deep learning 4D segmentation of organoid, lumen, cells and  
221 nuclei at hand, we developed a multiscale digital organoid viewer to explore and perform in-  
222 depth data mining. The viewer combines both lineage trees and segmented meshes,  
223 facilitating the direct comparison of different features within a multiscale digital organoid  
224 framework. We have added it to our LSTree Github repository along with example data, also  
225 including the possibility to overlay recorded images with the corresponding meshes allowing  
226 a direct inspection of the predicted segmentation (**Fig 3a, Supplementary Movie 2**). As can  
227 be seen through the example datasets present in the repository, this interactive viewer allows  
228 associated features to be displayed, selected nodes to be interactively highlighted on the  
229 meshes, and color coding of both trees and meshes to be assigned independently. This  
230 way same or complementary features can be visualized at once (All currently extracted  
231 features are discussed in **Supplementary Note 4** and **Supplementary Table 2**)

232 As an example of the image-analysis and visualization tools presented in the framework,  
233 nuclear volume quantifications can be evaluated directly onto the tree of a specific dataset  
234 (**Fig 3b**). Using this approach, it is possible to observe and quantify how much nuclei volumes  
235 change with each generation and over time, with the smallest volumes observed right after  
236 division. Similarly, we observe that the nuclear distance to the basal membrane (**Fig 3c**)  
237 increases due to interkinetic nuclear migration towards the apical side. Combining the same  
238 visualization procedure with the segmented meshes, we render the nuclei or cells in 3D, using  
239 the same color-coding as for feature on the trees (**Fig 3d**). Last but not least, we also compare  
240 the extracted features against the general trend from all other datasets combined, allowing  
241 us a direct evaluation of variability across experiments (**Fig 3e,f**), evaluating the increased  
242 distancing of nuclei from the apical membrane, a known effect due to epithelial polarization  
243 (**Fig 3f**).

244 In summary, this is a unique set of tools embedded under the same workflow which allows  
245 not only multiscale segmentation of organoids along with lineage tree predictions, but also  
246 the simultaneous visualization of both trees and segmented meshes into a unified web-  
247 viewer. All steps of the process are implemented to keep storage, memory, and manual  
248 tuning requirements to a minimum, making this a powerful and yet easily accessible part of  
249 the light-sheet framework.

250

### 251 [Functional imaging through fixation and backtracking](#)

252 Next, we analyzed functional information on the tracked cells and organoids contained in the  
253 lineage trees. Although our imaging framework allows the visualization and quantification of  
254 a large number of features at the cellular and organoid levels throughout organoid growth,  
255 functional information remains dependent on fluorescent reporter organoid lines. The easiest  
256 way to theoretically approach this is to perform stable multicolor live imaging for long periods  
257 of time. However, overlapping emission/excitation spectra limits the total number of  
258 fluorescent reporters and concerns regarding interference with the normal cell function,  
259 signal-to-noise sensitivity for low abundant proteins, photostability and general phototoxicity

260 due to laser illumination limit the use of fluorescent reporters. To overcome this, we fixed  
261 and added an immunolabelling steps at the end of the live recordings to assess the end state  
262 of the cells. Then we tracked the immunolabelled cells back through the lineage tree (**Fig 4a**),  
263 using LSTree for further visualization and analysis.

264 In details, we fixed the sample at the end of the recording with 4% PFA, to then perform the  
265 immunolabelling protocol (see **Methods Section**). The pre-patterning of the FEP foil holding  
266 the sample was crucial, as without it the Matrigel drops were washed out. To account for  
267 organoid drifts, we imaged the entire fixation procedure, so that the organoids could be  
268 tracked during fixation, leading to a recovery of more than 80% (for more detailed  
269 information please see **Supplementary Note 6**). To register the fixed organoids to the last  
270 time-point of the live recording we used similarity transformations implemented in ITK and  
271 available via Elastix<sup>28,29</sup> (used as a stand-alone tool, as exemplified in **Fig 4b**. For more  
272 information, please refer to the **Methods Section** and **Supplementary Note 6**). To test this  
273 approach, we imaged H2B-mCherry, mem9-GFP organoids until day 3 (**Supplementary Movie**  
274 **3** left). It has been shown that between around day 1.5 intestinal organoids break symmetry  
275 through the appearance of the first differentiated cells of the secretory lineage (Paneth cells,  
276 Lysozyme). Preceding the appearance of Paneth cells there is the local establishment of a  
277 Notch-Delta lateral inhibition event, with future Paneth cells being typically Delta Like Ligand  
278 1 positive (DLL1+)<sup>6</sup>. To analyze symmetry breaking, we fixed the organoids at 56 hours and  
279 stained for DLL1-Alexa488 and Lys-Alexa647 (**Fig 4c-e**, **Supplementary Movie 3** right).  
280 Intriguingly, the two DLL1+ cells are two sister cells that were formed at the end of the division  
281 from generation 5 to generation 6, around 10 hours before fixation.

282 To follow cellular dynamics and changes of features of these specific cells in their spatial  
283 environment we analyzed nuclei and cell volumes (extracted with LSTree) per generation of  
284 the backtracked cells from generation 5 and 6 and compared them to all the other cells during  
285 the same generations (**Fig 4f**). Interestingly, cellular, and nuclear volumes of the backtracked  
286 cells do not seem to deviate relative to each other during generation 5. After cell division and  
287 entering generation 6, however, the nuclei volumes of both DLL1+ sister cells show an  
288 increased relative difference to one another, with the Lys+ cell having a slightly larger nucleus.  
289 Changes in nuclear volume related to appearance of DLL1+ signal was also observed in other  
290 datasets (**Supplementary Figure 6**).

291 Next, we evaluated the dynamics of neighbor exchange by cross-checking the closest cells to  
292 a backtracked cell(s) of interest at each time-point with LSTree. We examined if the progeny  
293 of these two sister cells had high level of mixing with other cells during cyst growth. From the  
294 visualization of the tracked neighbors on the lineage tree and segmented meshes (**Fig 4g**), it  
295 is apparent that neighbor exchanges, although distributed across the tree, do not happen  
296 often nor with many different cells, keeping an average of 5 cells.

297 The above results show that, by combining our light-sheet framework with standard fixation  
298 and registration techniques we can broaden the level of functional information, bridging it to  
299 the dynamical processes during live imaging. Consequently, we were capable of dissecting  
300 some initial dynamical elements preceding the formation of DLL1+ and Paneth cells in the  
301 context of the entire organoid development, analyzing the process of symmetry-breaking  
302 events across biological scales.

303

## 304 Nuclei merging events during organoid growth

305 From our backtracking example it became apparent that one cell undergoes multiple rounds  
306 of failed divisions, with two daughter cells merging before a new division starts (**Fig 5a**). Upon  
307 further inspection of the other lineage trees, we realized that most of the datasets contained  
308 at least one merging event during early phase of organoid growth whereby two sister nuclei,  
309 at the end of their cell cycle, divided again into two instead of into four nuclei (**Supplementary**  
310 **Figure 7**). To investigate whether a failed division during the previous mitotic cycle was  
311 causing these nuclei merging, we examined the last step of the previous cell division. In all  
312 cases there was a problem during late cytokinesis, with the two sister cells never fully  
313 separating (**Fig 5a,b**). Nuclear volume for all the daughters arising after the merging event is  
314 clearly increased and cell volume followed the same behavior, roughly doubling in tetraploid  
315 cells (**Fig 5c,d**). To dismiss the possibility that these mitotic failures are caused by phototoxic  
316 effects of the imaging itself, we performed a time-course experiment with wild-type  
317 organoids grown from single cells under same medium conditions as the live recordings. We  
318 fixed organoids at days 2 and 3, staining them for e-Cadherin and DAPI. Despite the lack of  
319 continuous illumination, the resulting data showed many cysts with polynucleated cells, as  
320 well as cells with enlarged nuclei (**Fig 5e**).

321 Using the framework we were able to follow the fate of the progeny of a cell that underwent  
322 cytokinesis failure and surprisingly we noticed that they can lead to cells that remain part of  
323 the epithelium until the end of the recordings without dying, when we can observe fully  
324 budded organoids or mature enterocysts (end of day 4) (**Fig 5f,g**). Yet, comparing to  
325 unaffected parts of the trees, this binucleation progeny typically has higher probability to be  
326 extruded into the lumen (~46% for merged progeny against ~5% for other cells). Another  
327 intriguing observation is that the remaining 54% of the cells are never localized to the crypt  
328 but to the villus (**Fig 5f, Supplementary Figure 8**). This is an interesting result, as it suggests  
329 that the cells that undergo cytokinesis failure, and might have chromosomal defect, do not  
330 migrate or differentiate into niche cells (Stem cells and Paneth cells) but stay as villus cells  
331 that are shorter lived. This might mean that there are mechanisms to maintain cellular  
332 integrity in the stem cell niche avoiding damaged cells in the crypt.

333 Molecularly, it is known that the Large tumor suppressor kinase 1 (Lats1) can influence  
334 cytokinesis failure via lack of inhibition of Lim kinase 1 (Limk1)<sup>30-32</sup>. This poses an interesting  
335 hypothesis on the role of mitotic failure in intestinal regeneration as Lats1 and Yap1 are  
336 master regulators of regenerative response of the intestinal epithelium<sup>33,34</sup>. Analysis of  
337 RNAseq from previous studies<sup>6</sup>, show decrease in Lats1 expression during initial days of  
338 organoid growth that mimic the regenerative response of the intestinal epithelium<sup>6</sup>. This  
339 regenerative response is achieved by downregulating Lats1 as a negative regulator of Yap1.  
340 We initially stained for Limk1 and could see cell-to-cell variability of its expression  
341 (**Supplementary Figure 9a,b**). To further analyze the role of Lats1 and Limk1 in the regulation  
342 of cytokinesis failure in the early days of organoid formation we perturbed Lats1 and Limk1  
343 activity. Time-course imaging of Lats1 double knockouts<sup>6</sup> showed several cysts with double  
344 nucleated cells that result from mitotic failures (**Supplementary Figure 9c**). Moreover,  
345 inhibition of Lats1 and Limk1 with chemical inhibitors (Truli and Damnacanthal, see **Methods**  
346 **Section and Supplementary Figure 9**), increased and decreased the number of bi-nucleated  
347 cells, respectively (**Fig 5h,i**). Lats1 inhibition also display an increase of Yap1 activation. This  
348 shows that in intestinal organoids formation, cytokinesis failure is regulated by Lats1 activity  
349 that in turn is a negative regulator of Limk1.



350 Taken together, through the multi scale approach of 3D segmentation, feature extraction and  
351 lineage tree analysis we were able to identify consistent polyploidy events during early  
352 intestinal organoid development and the fate of their progeny. Our framework allowed us to  
353 bridge the observed mitotic defects across scales towards the tissue scale, showing the end  
354 fate of the merged cells progeny and spatially locating them onto the mature organoid  
355 morphology. This is shedding new light on the robustness of a regenerative YAP cellular state,  
356 questioning the role of polyploidy in intestinal regeneration.

## 357 **Discussion**

358 Here we have presented a unified light-sheet imaging framework tailored to intestinal  
359 organoid development. Our framework encompasses optimization of sample mounting,  
360 microscope recording and pre-processing, generating high-quality datasets with minimal  
361 storage needs. The image analysis and visualization part, named LSTree, is a comprehensive  
362 approach that uniquely combines image pre-processing, single cell tracking and multiscale  
363 segmentation and feature extraction along with a dedicated unified visualization and analysis  
364 tool. We show that this framework is capable of fully segmenting and tracking intestinal  
365 organoids as they grow from single cells for several days, bridging biological scales to the point  
366 when the organoid has hundreds of cells. Information on organoid, lumen, cell and nuclei  
367 volumes along with other multivariate features can be simultaneously visualized with the  
368 lineage tree data and further analyzed through a web-based Digital Organoid Viewer,  
369 facilitating a more global understanding of the dynamics acquired at subcellular resolution.  
370 The use of specialized neural networks dedicated to multiscale segmentation and lineage tree  
371 predictions allow the framework to be plastic enough to handle different kinds of live-imaging  
372 data as well as continuously improve through the utilization of dedicated tools for retraining  
373 of the models. Furthermore, the training architectures keep the number of parameters and  
374 computational resources to a minimum, relieving the needs for any highly specialized IT infra-  
375 structure, as they can be directly used on off-the-shelf workstations.

376 The combination of live imaging with standard fixation techniques, via the development of  
377 sample holder patterned with a cold stamp technique, allows the tracking of immunolabelled  
378 cells back in time and space and compare their features to all of the other cells over the entire  
379 organoid growth. Unlike lineage tracing in single cell RNA sequencing, which clusters cells by  
380 their RNA phenotypic fingerprint or a barcode, with our approach we can focus on the missing  
381 spatiotemporal organization in a causal way, as we follow the same cells over time.  
382 Consequently, we can now address the evolution of cells that can give rise to the first  
383 symmetry breaking event, keeping track of local interaction within the whole organoid.

384 Although suited to intestinal organoids, or to systems with smaller size, such as the mouse  
385 embryo, we recognize that particular challenges can be addressed to make our framework  
386 best suited to other case scenarios. For example, the application of our framework to larger  
387 organoids (surpassing diameters of 200  $\mu\text{m}$  or being composed of highly dense cell  
388 aggregates) would best require light-sheet microscopes with more than one detection  
389 objective, or with sample rotation, so that the samples can be visualized from the opposite  
390 side as well, with the multi-view stacks properly fused afterwards. Furthermore, the  
391 utilization of multiphoton imaging could be of benefit to improve light-tissue penetration

392 depth. Here the challenge is to provide multi-view imaging and yet keep the multi-sample  
393 aspect, so that systems with low growth efficiency can also be studied.

394 On the analysis side, the utilization of tracking spots for aiding in nuclei segmentation  
395 prediction shows to be an interesting approach to minimize the amount of hand annotated  
396 data for training. The extension of this approach towards cell volume estimation is a valid first  
397 approach, however, may still yield “noisy” cell volumes over time. To refine this, retraining  
398 with a few hand-annotated cells would be of good practice. Lastly, lineage tree prediction is  
399 still highly dependent on good temporal spacing and good nuclei segmentation. Especially for  
400 the challenging case of samples with low efficiency, such as the intestinal organoids, we tackle  
401 this issue with the careful adjustment of imaging parameters and of initial nuclei  
402 segmentation, as well as by allowing the workflow to receive input from other tracking  
403 methods such as Elephant. The possibility to use current state of the art tracking strategies  
404 such as Elephant or Mastodon helps especially to get first lineage trees done, and allows our  
405 LSTree workflow to be agnostic to only one approach. For the future we imagine that the  
406 inclusion of 3D ellipsoids instead of only spheres as weak annotation input for nuclei  
407 segmentation model training will aid in the nuclei segmentation quality, as the ellipsoids  
408 inherently carry more spatial information on the shape of the nuclei to be segmented.

409 Last, we present appearance of cells having cytokinesis-related mitotic errors leading to  
410 binucleation during early organoid growth. With LSTree we were able of rapidly verifying  
411 these errors across a multitude of different long-term recordings, showing that they are a  
412 consistent feature during early cyst growth. Interestingly, polyploidy has been associated with  
413 wound healing after injury<sup>36</sup>. In the liver, polyploid cells seem to have a tumor-suppressor  
414 role with polyploid cells occurring mostly due to cytokinesis failure and  
415 endoreduplication<sup>37,38</sup>. However, polyploid hepatic cells are mostly quiescent and do not  
416 divide unless the liver undergoes regenerative process due to a lesion. In contrast, our  
417 observed bi-nucleated cells do not undergo cell cycle arrest, but continue to divide for even  
418 multiple cycles, either with or without repeated clear mitotic failure. We also show that  
419 although these cells may appear in the crypt region during crypt formation (during days 3-4),  
420 they typically do not manage to reside in the crypt, whereas cells in the villus region remain  
421 part of the epithelium. Mitotic errors are negatively regulated by overactivation of Lats1 via  
422 regulation of Limk1. Since Lats has a direct implication during cytokinesis, we propose that  
423 during organoid growth and possibly intestinal regeneration there must be a balance  
424 between high-proliferative regenerative state – which is more error prone – and a  
425 counteracting checkpoint at the tissue scale to avoid mutations in the stem cell compartment.  
426 This way tissue integrity can be achieved fast, with any remaining mutations in the villus being  
427 eventually shed off via e.g. anoikis when cells reenter homeostasis.

428 In conclusion, with LSTree we can cross biological scales with unprecedented detail, as we can  
429 follow particular subcellular behaviors while keeping track on the entire tissue development  
430 over long periods of time. The usability of the tools presented can go far beyond the examples  
431 shown here, as they can be compatible with different light-sheet modalities making this  
432 framework also very useful in the study of other 3D cell cultures. In particular for the analysis,  
433 we believe LSTree to be a first step towards a comprehensive and quantitative framework  
434 dedicated to the creation of fully digital organoid maps, so that the intrinsic culture  
435 variabilities can be overcome with the creation of averaged organoids to be used as  
436 landmarks for future studies.

437

## 438 **Methods**

### 439 [Ethics statement](#)

440 All animal based studies have been approved by Basel Cantonal Veterinary Authorities and  
441 conducted in accordance with the Guide for Care and Use of Laboratory Animals.

442

### 443 [Organoid lines](#)

444 Male and female outbred mice between 8 and 12 weeks old were used for all experiments.  
445 Regarding husbandry, all mice have a 12/12 hours day/night cycle. Medium temperature is  
446 kept at 22°C and relative humidity at 50% .

447 Mouse lines used for time-course experiments: C57BL/6 wild type (Charles River  
448 Laboratories), one 12 weeks old male and one 8 weeks female mice.

449 For all light-sheet movies, we used H2B-mCherry C57BL/6 x C3H F1 female intestines  
450 heterozygous for H2B-mCherry (received already as intestines, kind gift from T. Hiragi lab,  
451 EMBL). For H2B-mCherry/mem9-GFP organoids, H2B-mCherry organoids were infected with  
452 LV.EF1.AcGFP1-Mem-9 lentivirus particle (Clontech, Takara Bio USA). For the H2B-miRFP670  
453 line, B6/N x R26 Fucci2 (Tg/+) intestines (kind gift from J. Skotheim lab, Stanford) were  
454 infected with pGK Dest H2B-miRFP670 (Addgene). For Lats DKO, Lats1 $\Delta/\Delta$ ; Lats2 $\Delta/\Delta$  (LATS  
455 DKO, intestines as kind gift from Jeff Wrana, Department of Molecular Genetics, University of  
456 Toronto, Canada)<sup>39</sup> time-course of published data<sup>6</sup> was analyzed.

457

### 458 [Organoid culture](#)

459 For initial organoid culture a section of the initial part of the small intestine was opened  
460 lengthwise and cleaned with cold PBS. Then, after removal of villi by scraping with a cold glass  
461 slide, the section was sliced into small fragments of roughly 2 mm in length. All fragments  
462 were then incubated in 2.5 mM EDTA/PBS at 4 °C for 30 min with shaking. Supernatant was  
463 removed and pieces of intestine were re-suspended in DMEM/F12 with 0.1% BSA. The tissue  
464 was then shaken vigorously. To collect the first fraction, the suspension was passed through  
465 a 70  $\mu$ m strainer.

466 The remaining tissue pieces were collected from the strainer and fresh DMEM/F12 with 0.1%  
467 BSA was added, followed by vigorous shaking. The crypt fraction was again collected by  
468 passing through a 70  $\mu$ m strainer. In total, 4 fractions were collected. Each fraction was  
469 centrifuged at 300g for 5 min at 4 °C. Supernatant was removed and the pellet was re-  
470 suspended into Matrigel with medium (1:1 ratio) and plated into 24 well plates. Organoids  
471 were kept in IntestiCult Organoid Growth Medium (STEMCELL Technologies) with 100  $\mu$ g/ml  
472 Penicillin-Streptomycin for further amplification and maintenance.

473

### 474 [Organoid preparation for time-course experiments](#)

475 WT organoids passage 10 were collected 5-7 days after passaging and digested with TrypLE  
476 (Thermo Fisher Scientific) for 20 min at 37 °C. The resulting dissociated cells were filtered

477 through a 30  $\mu\text{m}$  cell strainer (Sysmex) and single alive cells were sorted by FACS (Becton  
478 Dickinson Influx cell sorter with BD FACS Software 1.2.0.142, or Becton Dickinson FACS Aria III  
479 using BD FACSDiva Software Version 8.0.1). Forward scatter and side scatter properties were  
480 used to remove cell doublets and dead cells. The collected cells were resuspended in ENR  
481 medium (advanced DMEM/F-12 with 15 mM HEPES (STEM CELL Technologies) supplemented  
482 with 100  $\mu\text{g}/\text{ml}$  Penicillin-Streptomycin, 1 $\times$ Glutamax (Thermo Fisher Scientific), 1 $\times$ B27  
483 (Thermo Fisher Scientific), 1 $\times$ N2 (Thermo Fisher Scientific), 1mM N-acetylcysteine (Sigma),  
484 500ng/ml R-Spondin (kind gift from Novartis), 100 ng/ml Noggin (PeproTech) and 100 ng/ml  
485 murine EGF (R&D Systems) and mixed 1:1 with Matrigel (Corning). Cells were seeded at a  
486 density of 3000 cells per 5 $\mu\text{l}$  drops per well of 96 well imaging plates (Greiner, 655090)( 2  
487 plates and 3 wells per condition). After 20 min of solidification at 37  $^{\circ}\text{C}$ , 100  $\mu\text{l}$  of medium was  
488 overlaid. From day 0 to day 1, ENR was supplemented with 20% Wnt3a-conditioned medium  
489 (Wnt3a-CM), 10  $\mu\text{M}$  Y-27632 (ROCK inhibitor, STEMCELL Technologies) and 3  $\mu\text{M}$  of  
490 CHIR99021 (GSK3B inhibitor, STEMCELL Technologies, cat # 72054). From day 1 to 3 ENR was  
491 supplemented with 20% Wnt3a-CM and 10  $\mu\text{M}$  Y-27632.

492

#### 493 [Fixed sample preparation and time-course imaging](#)

494 Organoids are embedded in a Matrigel droplet. Due to the nature of the droplet, individual  
495 organoids are located at different heights in the Matrigel drop. To allow imaging of all  
496 organoids within a similar z-range, each 96-well plate was centrifuged at 847 g for 10 min in  
497 a pre-cooled centrifuge at 10  $^{\circ}\text{C}$  prior to fixation. Organoids were fixed in 4% PFA (Electron  
498 Microscopy Sciences) in PBS for 45 min at room temperature. For time course and compound  
499 experiments, organoids were permeabilized with 0.5% Triton X-100 (Sigma-Aldrich) for 1 h  
500 and blocked with 3% Donkey Serum (Sigma-Aldrich) in PBS with 0.1% Triton X-100 for 1 h.

501

#### 502 [WT imaging](#)

503 For the images in Figure 5e, membrane staining with E-Cadherin (BD Biosciences, # 610182)  
504 was done at 1:300 ratio in Blocking buffer for 20 hours at 4 $^{\circ}\text{C}$ . DAPI staining was performed  
505 at concentration of 300 nM for 30 min at room temperature. All secondary antibodies were  
506 added at 1:300 for 1 hour in room temperature. Cell nuclei were stained with 20  $\mu\text{g}/\text{ml}$  DAPI  
507 (4',6-Diamidino-2-Phenylindole, Invitrogen) in PBS for 15 min. High-throughput imaging was  
508 done with an automated spinning disk microscope from Yokogawa (CellVoyager 7000S), with  
509 an enhanced CSU-W1 spinning disk (Microlens-enhanced dual Nipkow disk confocal scanner),  
510 a 40x (NA = 0.95) Olympus objective, and a Neo sCMOS camera (Andor, 2,560  $\times$  2,160 pixels).  
511 For imaging, an intelligent imaging approach was used in the Yokogawa CV7000 (Search First  
512 module of Wako software). For each well, one field was acquired with 2x resolution in order  
513 to cover the complete well. This overview fields were then used to segment individual  
514 organoids on the fly with a custom written ImageJ macro which outputs coordinates of  
515 individual organoid positions. These coordinated were then subsequently imaged with high  
516 resolution (40x, NA = 0.95). For each site, z-planes spanning a range up to 140  $\mu\text{m}$  were  
517 acquired. For the data in Figure 5e,h and in Supplementary Figure 9 2  $\mu\text{m}$  z-steps were used.

518

## 519 Lats-DKO

520 Analysed data stems from a previous publication<sup>6</sup>, with Lats DKO organoids dissociated into  
521 single cells and plated into 96 well plates, fixed and stained with DAPI following the published  
522 protocols. Tamoxifen induction (1:1000) was kept in the medium until fixation time.

523

## 524 RXRi

525 RXR inhibition was achieved by adding the Cpd2170 RXR antagonist<sup>7</sup> compound at 1:2000  
526 ratio to the medium from the moment single cells were seeded onto the light-sheet holder.  
527 The compound was kept throughout the data acquisition. Organoids used for this experiment  
528 had been infected with H2B-iRFP670 for live nuclei labeling.

529

## 530 Inhibition experiments: Lats1/2 and Limk1 inhibition time-course

531 For the evaluation of binucleated cells in Fig5h-i and Supplementary Figure 9, FACS sorted  
532 (Becton Dickinson Influx cell sorter with BD FACS Software 1.2.0.142, or Becton Dickinson  
533 FACSAria III using BD FACSDiva Software Version 8.0.1). WT mouse intestinal organoids at  
534 passage 10 were dissociated and grown from single cells as described above. Inhibitors were  
535 resuspended in DMSO and serially diluted in medium to their final working concentration and  
536 added on day 0 (Lats1/2 inhibitor Truli<sup>40</sup> (CSNpharm, # CSN26140) or the Limk1 inhibitor  
537 Damnacanthal<sup>41</sup> (Tocris, # 1936)). One plate was fixed with 4% PFA on day 2 (48hrs after  
538 plating) and the other one on day 3 (72hrs after plating) as described in the previous section.  
539 At the end of the time course all plates were permeabilized with 0.5% Triton X-100 (Sigma-  
540 Aldrich) for 1 h and blocked with 3% Donkey Serum (Sigma-Aldrich) in PBS with 0.1% Triton  
541 X-100 for 1 h. Primary antibodies were diluted in blocking as follow: anti- e-Cadherin (BD  
542 Biosciences, # 610182) 1:400, anti-Limk1 (Abcam, # ab194798) 1:400 and anti-Yap1 (Cell  
543 Signaling, # 14074) 1:400 and incubated for 1h at RT on a shaking plate. The primary  
544 antibodies were washed with PBS 3x10min at RT on a shaking plate. Both secondary  
545 antibodies (Alexa Fluor 568 donkey anti mouse, Thermo Fisher Scientific; A10042 and Alexa  
546 Fluor 488 donkey anti rabbit, Thermo Fisher Scientific; A-21202) were diluted 1:400 and  
547 incubated for 2hrs at RT on a shaking plate. The plates were then washed with PBS 3x10min  
548 at RT on a shaking plate and cell nuclei were stained with 20 µg/ml DAPI (4',6-Diamidino-2-  
549 Phenylindole, Invitrogen) in PBS for 15 min. Plates were then covered in aluminum foil and  
550 imaged with the ImageXpress from MolecularDevices. Stacks were acquired with 20X  
551 objective (0.3417 µm in X and Y) and 3 µm steps. For analysis, 200 randomly picked organoids  
552 were selected for each condition and the number of binucleated cells present on each one  
553 evaluated.

554

555

## 556 Light-sheet sample preparation

557 H2b-mCherry / mem9-GFP and H2B-iRFP670 organoids were collected and digested with  
558 TrypLE (Thermo Fisher Scientific) for 20 min at 37 °C. Alive double positive (mCherry/GFP)  
559 cells were sorted by FACS (Becton Dickinson Influx cell sorter with BD FACS Software  
560 1.2.0.142, or Becton Dickinson FACSAria III using BD FACSDiva Software Version 8.0.1). and  
561 collected in medium containing advanced DMEM/F-12 with 15 mM HEPES (STEM CELL

562 Technologies) supplemented with 100 µg/ml Penicillin-Streptomycin, 1xGlutamax (Thermo  
563 Fisher Scientific), 1x27 (Thermo Fisher Scientific), 1xN2 (Thermo Fisher Scientific), 1mM N-  
564 acetylcysteine (Sigma), 500ng/ml R-Spondin (kind gift from Novartis), 100 ng/ml Noggin  
565 (PeproTech) and 100 ng/ml murine EGF (R&D Systems). 2500 cells were then embedded in  
566 5ul drop of Matrigel/medium in 60/40 ratio. Drops were placed in the imaging chamber and  
567 incubated for 20 min before being covered with 1ml of medium. For the first three days,  
568 medium was supplemented with 20% Wnt3a-CM and 10 µM Y-27632 (ROCK inhibitor,  
569 STEMCELL Technologies). For the first day, in addition, 3µM of CHIR99021 (STEMCELL  
570 Technologies) were supplemented. After 2 hours incubation in a cell culture incubator the  
571 imaging chamber was transferred to the microscope kept at 37C and 5% CO<sub>2</sub>.

572

### 573 [Light-sheet imaging](#)

574 For all light-sheet experiments a LS1-Live dual illumination and inverted detection microscope  
575 from Viventis Microscopy Sàrl was used. Different single cells were selected as starting  
576 positions and imaged every 10 min for up to 5 days. A volume of 150 -200µm was acquired  
577 with a Z spacing of 2µm between slices and 100 ms exposure time for each slice. Laser  
578 intensity was kept to a minimum necessary to still obtain reasonable signal to noise from the  
579 raw data, while keeping phototoxicity to a minimum possible. Medium was exchanged  
580 manually under the microscopy every day.

581

### 582 [Fixation on time-lapse recordings](#)

583 Organoids are embedded in 5 µm Matrigel droplets which are deposited at equal distances  
584 on top of the FEP foil of the light-sheet sample holder. After live imaging is done, the medium  
585 is replaced by 4% PFA in PBS, and left in the chamber for maximum 30 minutes at 37°C in the  
586 microscope. After fixation the organoids were permeabilized with 0.5% Triton X-100 (Sigma-  
587 Aldrich) for 1 h and blocked with 3% Donkey Serum (Sigma-Aldrich) in PBS with 0.1% Triton  
588 X-100 for 1 h. For the images in Figure 4, the cyst was stained with DLL1 antibody (R&D  
589 Systems, # AF3970) at 1:100 ratio and left overnight at 4°C. For Lysozyme (Dako, # A0099) we  
590 used a 1:400 ratio for 3 hours at room temperature.

591

### 592 [Registration for back-tracking after fixation of time-lapses](#)

593 Since PFA fixation causes the Matrigel droplet to flatten, we perform imaging while fixation  
594 is taking place. Typically we observe no change within the first 5 minutes, whereas after that  
595 there is a sudden increase in organoid movement towards the bottom of the sample holder.  
596 To take this into account, we increased the imaging volume and step size to be able to  
597 encompass a larger volume and still track the organoid. For the data in Figure 4 we increased  
598 stack size from 150 µm and 2 µm step size to 300 µm at 3 µm step size. However, larger values  
599 can also be used.

600 Nonetheless, the flattening of the droplet will lead the organoids to rotate or translate in  
601 space. Furthermore, PFA fixation also changes the shape of tissue samples by shrinking or  
602 swelling. To bridge the translational, rotational and rescaling of the organoids during fixation  
603 procedures, we registered fixed organoids using Elastix v4.900 (<https://elastix.lumc.nl/>). Since  
604 Elastix can be directly installed from the repository as pre-compiled libraries, we refrained

605 from embedding the registration into LSTree, and left it as a stand-alone tool. For all  
606 registrations using the similarity transform, a base parameter file set for performing similarity  
607 transformations was used and eventually modified so that best results could be achieved. An  
608 example of the registration parameters is provided in ‘Elastix\_parameter\_Affine.txt’ file in the  
609 Supplementary Software.

610

## 611 [LSTree modules](#)

612 LSTree (<https://github.com/fmi-basel/LSTree>) is a luigi-based workflow  
613 (<https://github.com/spotify/luigi>) which encompasses jupyter notebooks for cropping and  
614 general utilities, as well as luigi lasks for denoising, deconvolution and multiscale  
615 segmentation and tree-prediction, along with feature extraction. Pre-processing steps rely  
616 mostly on cropping and registration, denoising, and deconvolution steps. Deconvolution was  
617 based on flowdec (<https://github.com/hammerlab/flowdec>). Although not part of LSTree  
618 itself, improvements in the microscope software (on-the-fly LZW compression, position  
619 dependent illumination alignment) were performed in collaboration with Viventis Microscopy  
620 Sàrl and are now part of their current microscope software. A lzw compression python code  
621 (‘parallel\_image\_compressor.py’) is available in the **Supplementary Software**.

622 Detailed information regarding pre-processing, segmentation strategies and feature  
623 extraction can be found in **Supplementary Text**.

624

## 625 [Software](#)

626 For deconvolution of the images, PSFs were averaged using the PSF Distiller from Huygens  
627 compute engine 20.10.1p1. For visualization of images ImageJ v.1.53h and Paraview 5.8.0  
628 were used, and Elastix v4.900 was used for registration of organoids.

629

## 630 [IT requirements](#)

631 The LSTree analysis tasks have been trained and used on a workstation with following  
632 specifications: 16 core Intel Xeon W-2145, 64 GB 2666MHz DDR4 RAM equipped with a Nvidia  
633 Quadro RTX 6000 GPU with 24 GB VRAM and using Ubuntu 18.04.6 LTS. All code runs with  
634 Nvidia cudatoolkit 10.1, and cuDNN 7.

635 Minimally, one would need 16 GB of RAM and a Tensorflow compatible GPU with at least 8  
636 GB of VRAM. Since many of the steps of the pipeline run in parallel, a higher number of CPUs  
637 is also desirable.

638 A step-by-step guide on installation and on how to run the example data provided can be  
639 found in the repository ([www.github.com/fmi-basel/LSTree](http://www.github.com/fmi-basel/LSTree)).

640

## 641 [Statistics & Reproducibility](#)

642 For all experiments no statistical method was used to predetermine sample size. Sample size  
643 was determined based on previous related studies in the field<sup>11,16,27</sup>. For long-term live  
644 imaging experiments, we assumed that the amount of timepoints comprised in the 7 different  
645 datasets would be sufficient to test the framework. In addition, 12 other datasets from

646 previous publication<sup>27</sup> were used for further challenging the analysis framework). No data  
647 were excluded from the analyses. Samples were randomly assigned. Investigators were not  
648 blinded to allocation during experiments and outcome assessment.

649

## 650 **Data Availability**

651 Source data are provided with this paper. A minimum example to test LSTree is provided  
652 within the repository. The light-sheet data and time-course data generated in this study have  
653 been deposited in the Zenodo database under accession code 10.5281/zenodo.6828906  
654 [<https://zenodo.org/record/6828906>]<sup>42</sup>. Due to storage space restrictions, for source light-  
655 sheet image data please contact Prisca Liberali for more information.

656

## 657 **Code Availability**

658 LSTree can be found publicly in GitHub (<https://github.com/fmi-basel/LSTree>) with its latest  
659 release referenced also in Zenodo (DOI: [10.5281/zenodo.6826914](https://doi.org/10.5281/zenodo.6826914))<sup>17</sup>. All other code used in  
660 this work is present in the Supplementary Software.

661



## 662 References

663

- 664 1 Mayr, U., Serra, D. & Liberali, P. Exploring single cells in space and time during tissue  
665 development, homeostasis and regeneration. *Development* **146**, dev176727,  
666 doi:10.1242/dev.176727 (2019).
- 667 2 Zinner, M., Lukonin, I. & Liberali, P. Design principles of tissue organisation: How single  
668 cells coordinate across scales. *Current Opinion in Cell Biology* **67**, 37-45,  
669 doi:10.1016/j.ceb.2020.07.004 (2020).
- 670 3 Xavier Da Silveira Dos Santos, A. & Liberali, P. From single cells to tissue self-  
671 organization. *The FEBS Journal* **286**, 1495-1513, doi:10.1111/febs.14694 (2019).
- 672 4 Bankaitis, E. D., Ha, A., Kuo, C. J. & Magness, S. T. Reserve Stem Cells in Intestinal  
673 Homeostasis and Injury. *Gastroenterology* **155**, 1348-1361,  
674 doi:10.1053/j.gastro.2018.08.016 (2018).
- 675 5 Sato, T. *et al.* Single Lgr5 stem cells build crypt-villus structures in vitro without a  
676 mesenchymal niche. *Nature* **459**, 262-265, doi:10.1038/nature07935 (2009).
- 677 6 Serra, D. *et al.* Self-organization and symmetry breaking in intestinal organoid  
678 development. *Nature* **569**, 66-72, doi:10.1038/s41586-019-1146-y (2019).
- 679 7 Lukonin, I. *et al.* Phenotypic landscape of intestinal organoid regeneration. *Nature*  
680 **586**, 275-280, doi:10.1038/s41586-020-2776-9 (2020).
- 681 8 Yang, Q. *et al.* Cell fate coordinates mechano-osmotic forces in intestinal crypt  
682 morphogenesis. *bioRxiv pre-print server*, doi:10.1101/2020.05.13.094359 (2020).
- 683 9 Krzic, U., Gunther, S., Saunders, T. E., Streichan, S. J. & Hufnagel, L. Multiview light-  
684 sheet microscope for rapid in toto imaging. *Nat Methods* **9**, 730-733,  
685 doi:10.1038/nmeth.2064 (2012).
- 686 10 McDole, K. *et al.* In Toto Imaging and Reconstruction of Post-Implantation Mouse  
687 Development at the Single-Cell Level. *Cell* **175**, 859-876 e833,  
688 doi:10.1016/j.cell.2018.09.031 (2018).
- 689 11 Alladin, A. *et al.* Tracking cells in epithelial acini by light sheet microscopy reveals  
690 proximity effects in breast cancer initiation. *eLife* **9**, doi:10.7554/eLife.54066 (2020).
- 691 12 Maioli, V. *et al.* Time-lapse 3-D measurements of a glucose biosensor in multicellular  
692 spheroids by light sheet fluorescence microscopy in commercial 96-well plates. *Sci Rep*  
693 **6**, 37777, doi:10.1038/srep37777 (2016).
- 694 13 Renner, H. *et al.* A fully automated high-throughput workflow for 3D-based chemical  
695 screening in human midbrain organoids. *Elife* **9**, doi:10.7554/eLife.52904 (2020).
- 696 14 Eismann, B. *et al.* Automated 3D light-sheet screening with high spatiotemporal  
697 resolution reveals mitotic phenotypes. *J Cell Sci* **133**, doi:10.1242/jcs.245043 (2020).
- 698 15 Kok, R. N. U. *et al.* OrganoidTracker: Efficient cell tracking using machine learning and  
699 manual error correction. *PLOS ONE* **15**, e0240802, doi:10.1371/journal.pone.0240802  
700 (2020).

- 701 16 Hof, L. *et al.* Long-term live imaging and multiscale analysis identify heterogeneity and  
702 core principles of epithelial organoid morphogenesis. *BMC Biology* **19**,  
703 doi:10.1186/s12915-021-00958-w (2021).
- 704 17 Multiscale light-sheet organoid imaging framework v. v0.2 (Zenodo / Github, 2022).
- 705 18 Dumortier, J. G. *et al.* Hydraulic fracturing and active coarsening position the lumen of  
706 the mouse blastocyst. *Science* **365**, 465-468, doi:10.1126/science.aaw7709 (2019).
- 707 19 Rossi, G. *et al.* Capturing Cardiogenesis in Gastruloids. *Cell Stem Cell* **28**, 230-240.e236,  
708 doi:10.1016/j.stem.2020.10.013 (2021).
- 709 20 Krull, A., Buchholz, T.-O. & Jug, F. Noise2Void - Learning Denoising from Single Noisy  
710 Images. *arXiv pre-print server*, doi:arxiv:1811.10980 (2019).
- 711 21 Czech, E., Aksoy, B. A., Aksoy, P. & Hammerbacher, J. Cytokit: a single-cell analysis  
712 toolkit for high dimensional fluorescent microscopy imaging. *BMC Bioinformatics* **20**,  
713 doi:10.1186/s12859-019-3055-3 (2019).
- 714 22 Ortiz, R., De Medeiros, G., Peters, A. H. F. M., Liberali, P. & Rempfler, M. 434-443  
715 (Springer International Publishing, 2020).
- 716 23 Ulman, V. *et al.* An objective comparison of cell-tracking algorithms. *Nature Methods*  
717 **14**, 1141-1152, doi:10.1038/nmeth.4473 (2017).
- 718 24 Moen, E. *et al.* *Accurate cell tracking and lineage construction in live-cell imaging*  
719 *experiments with deep learning* (Cold Spring Harbor Laboratory, 2019).
- 720 25 Sugawara, K., Cevrim, C. & Averof, M. *Tracking cell lineages in 3D by incremental deep*  
721 *learning* (Cold Spring Harbor Laboratory, 2021).
- 722 26 Sugawara, K., Cevrim, C. & Averof, M. Tracking cell lineages in 3D by incremental deep  
723 learning. *Elife* **11**, doi:10.7554/eLife.69380 (2022).
- 724 27 Strnad, P. *et al.* Inverted light-sheet microscope for imaging mouse pre-implantation  
725 development. *Nature Methods* **13**, 139-142, doi:10.1038/nmeth.3690 (2016).
- 726 28 Klein, S., Staring, M., Murphy, K., Viergever, M. A. & Pluim, J. P. W. elastix: A Toolbox  
727 for Intensity-Based Medical Image Registration. *IEEE Transactions on Medical Imaging*  
728 **29**, 196-205, doi:10.1109/TMI.2009.2035616 (2010).
- 729 29 Shamonin, D. Fast parallel image registration on CPU and GPU for diagnostic  
730 classification of Alzheimer's disease. *Frontiers in Neuroinformatics* **7**,  
731 doi:10.3389/fninf.2013.00050 (2013).
- 732 30 Yabuta, N. *et al.* N-terminal truncation of Lats1 causes abnormal cell growth control  
733 and chromosomal instability. *Journal of Cell Science* **126**, 508-520,  
734 doi:10.1242/jcs.113431 (2013).
- 735 31 Yang, X. *et al.* LATS1 tumour suppressor affects cytokinesis by inhibiting LIMK1. *Nature*  
736 *Cell Biology* **6**, 609-617, doi:10.1038/ncb1140 (2004).
- 737 32 Lens, S. M. A. & Medema, R. H. Cytokinesis defects and cancer. *Nature Reviews Cancer*  
738 **19**, 32-45, doi:10.1038/s41568-018-0084-6 (2019).

- 739 33 Hong, A. W., Meng, Z. & Guan, K. L. The Hippo pathway in intestinal regeneration and  
740 disease. *Nat Rev Gastroenterol Hepatol* **13**, 324-337, doi:10.1038/nrgastro.2016.59  
741 (2016).
- 742 34 Li, Q. *et al.* Lats1/2 Sustain Intestinal Stem Cells and Wnt Activation through TEAD-  
743 Dependent and Independent Transcription. *Cell Stem Cell* **26**, 675-692 e678,  
744 doi:10.1016/j.stem.2020.03.002 (2020).
- 745 35 Wheat, J. C. *et al.* Single-molecule imaging of transcription dynamics in somatic stem  
746 cells. *Nature* **583**, 431-436, doi:10.1038/s41586-020-2432-4 (2020).
- 747 36 Losick, Vicki P., Fox, Donald T. & Spradling, Allan C. Polyploidization and Cell Fusion  
748 Contribute to Wound Healing in the Adult *Drosophila* Epithelium. *Current*  
749 *Biology* **23**, 2224-2232, doi:10.1016/j.cub.2013.09.029 (2013).
- 750 37 Zhang, S. *et al.* The Polyploid State Plays a Tumor-Suppressive Role in the Liver.  
751 *Developmental Cell* **44**, 447-459.e445, doi:10.1016/j.devcel.2018.01.010 (2018).
- 752 38 Margall-Ducos, G., Celton-Morizur, S., Couton, D., Bregerie, O. & Desdouets, C. Liver  
753 tetraploidization is controlled by a new process of incomplete cytokinesis. **120**, 3633-  
754 3639, doi:10.1242/jcs.016907 (2007).
- 755 39 Gregorieff, A., Liu, Y., Inanlou, M. R., Khomchuk, Y. & Wrana, J. L. Yap-dependent  
756 reprogramming of Lgr5+ stem cells drives intestinal regeneration and cancer. *Nature*  
757 **526**, 715-718, doi:10.1038/nature15382 (2015).
- 758 40 Kastan, N. *et al.* Small-molecule inhibition of Lats kinases may promote Yap-  
759 dependent proliferation in postmitotic mammalian tissues. *Nat Commun* **12**, 3100,  
760 doi:10.1038/s41467-021-23395-3 (2021).
- 761 41 Ohashi, K. *et al.* Damnacanthal, an effective inhibitor of LIM-kinase, inhibits cell  
762 migration and invasion. *Mol Biol Cell* **25**, 828-840, doi:10.1091/mbc.E13-09-0540  
763 (2014).
- 764 42 de Medeiros, G., Ortiz, Raphael, Strnad, Petr, Boni, Andrea, Moos, Franziska, Repina,  
765 Nicole, Chalet-Meylan, Ludivine, Maurer, Francisca, & Liberali, Prisca. (Zenodo,  
766 2022).
- 767

768

## 769 Acknowledgements

770 We thank M. Rempfler for helpful discussions on framework implementation and support, D.  
771 Vischi, E. Tagliavini and Sjoerd van Eeden for IT support, T.-O. Buchholz for aid with  
772 segmentation evaluation and neural network support, J. Eglinger for help with KNIME  
773 workflow, Q. Yang for discussions on pre-processing, S. Xie for helpful discussions on  
774 biological aspects, A. Peters for light-sheet, H. Kohler for sorting, P. Argast for help with  
775 building the FEP foil aluminum stamp, C. Tsiairis, L. Gelman and laboratory members for  
776 reading the manuscript. Funding: EMBO (ALTF 571-2018 to G.M.), SNSF (POOP3\_157531

777 to P.L.). This work received funding from the ERC under the European Union's Horizon 2020  
778 research and innovation programme (grant agreement no. 758617).

779

780

## 781 **Author contributions**

782 P.L. and G.M. conceived and P.L. supervised the study, P.L., G.M., and A.B. designed the  
783 experiments, F.Ma., L.C.M. and G.M. cultured the organoids, G.M. and A.B. recorded the  
784 time-lapses, N.R. and G.M performed backtracking experiments. F.Mo. trained and evaluated  
785 tracking predictions with Elephant. P.S. wrote and implemented compression and position  
786 dependent illumination code into microscope software, A.B. created first Mastodon trees, R.O.  
787 wrote first LSTree workflow with the support of G.M., G.M. and L.C.M. performed time-  
788 course experiments. G.M., R.O. and P.L. analysed the data from the time-lapses, G.M, L.C.M.  
789 and P.L. analysed the time-course experiments, G.M., R.O. and P.L. wrote the paper.

790 Correspondence should be sent to Prisca Liberali ([prisca.liberali@fmi.ch](mailto:prisca.liberali@fmi.ch)).

791

## 792 **Competing Interests**

793 The authors declare the following competing interests: A.B. and P.S. are co-founders of  
794 Viventis Microscopy Sàrl that commercializes the light-sheet microscope used in this study.  
795 The remaining authors declare no competing interests.

796

797

798

799

800

801

802

## 803 Figures

804

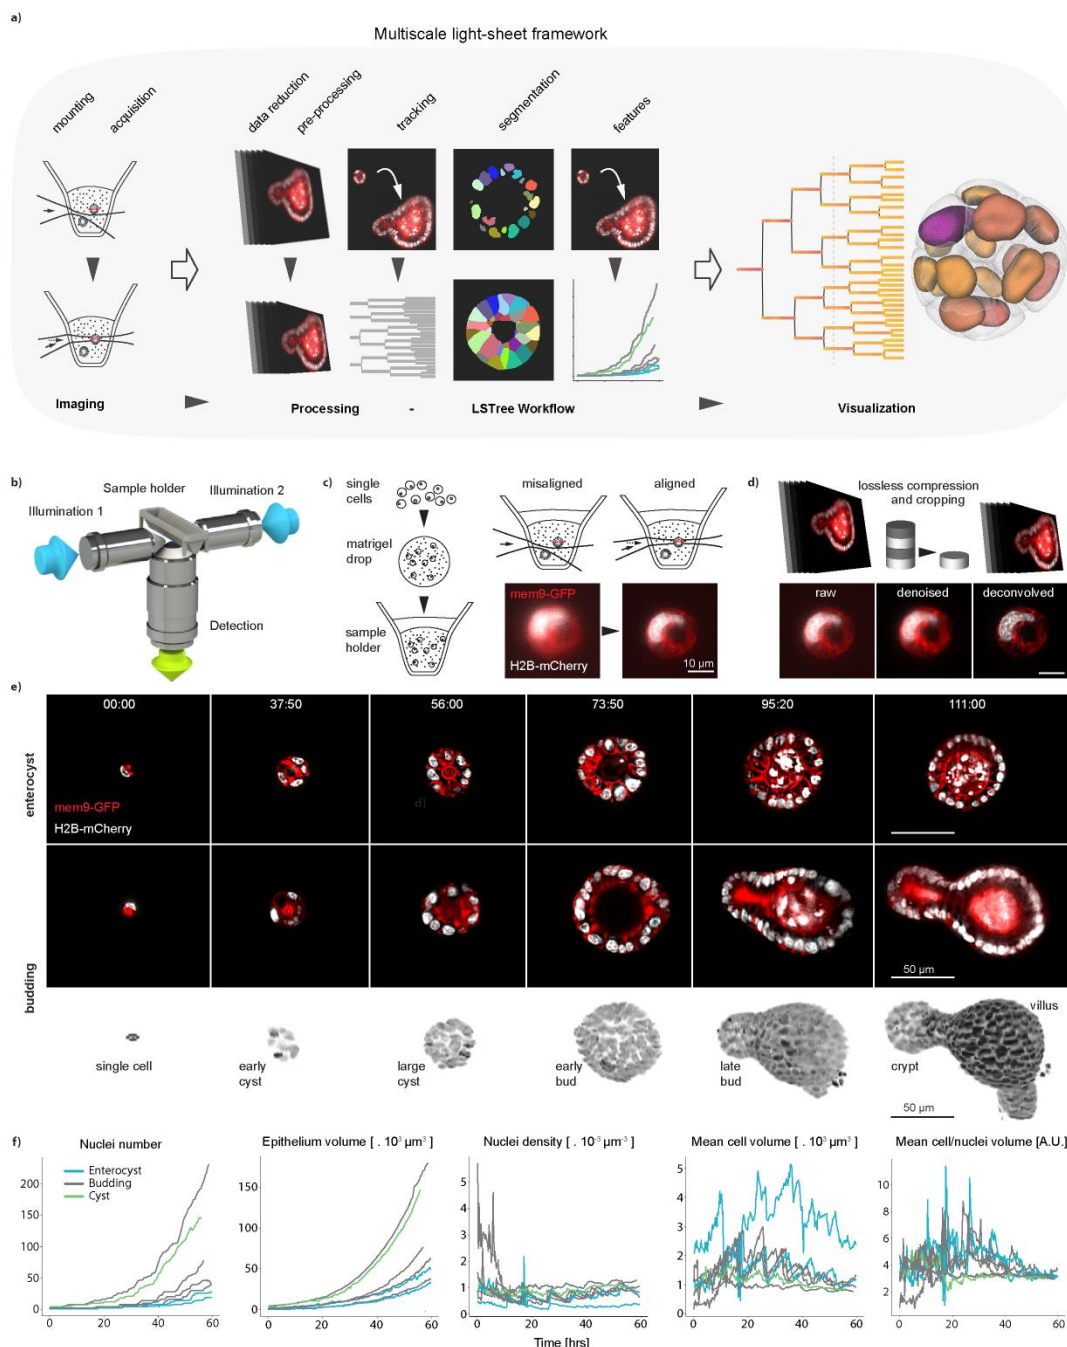

805

806

807

808

809

810

811

812

813

**Figure 1: Acquisition of high-resolution 3D organoid images.** a) Multiscale light-sheet imaging framework, depicting imaging stages, analysis workflow and visualization tool. b) Dual illumination inverted detection light-sheet objective configuration used in all of the recordings. c) Left: sample preparation is performed by mixing single cells dissociated from mature organoids with matrigel and depositing 5  $\mu\text{L}$  drops on the light-sheet sample holder. Right: sample position dependent illumination alignment corrects for possible misalignments of the illumination beam in reaching organoids distributed inside the Matrigel drop, improving SNR. d) Upper row: minimization of storage needs done with on-the-fly

814 compression and further cropping steps. Lower row: denoising and deconvolution steps  
815 further improve image quality. **e)** Time-lapse imaging of organoid growth. Top row shows still  
816 images of a growing enterocyst, whereas both lower rows show a stereotypical growth of a  
817 budding organoid as a cross sections as well as a projection in Paraview. **f)** Temporal evolution  
818 of nuclei number, epithelium volume, mean cell volume and the ratio between mean cell and  
819 mean nuclei volumes for all main 7 datasets considered in this work. Source data are provided  
820 as a Source Data file.  
821

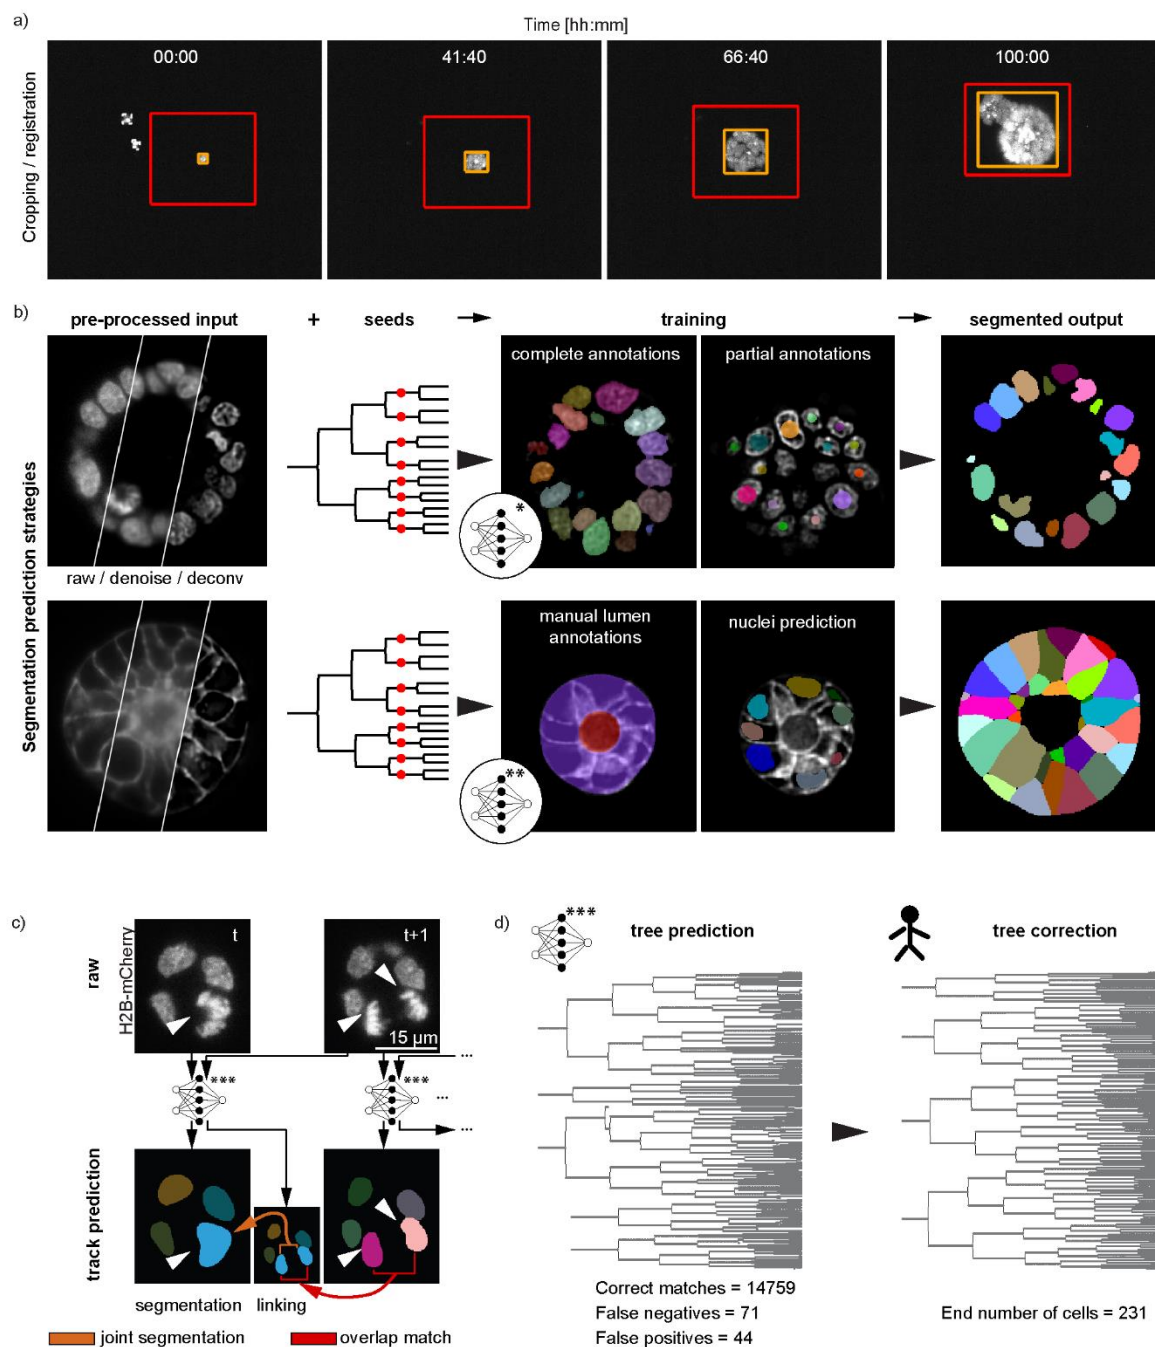

822  
823 **Figure 2: Cropping, segmentation and tree-prediction strategies underlying LSTree. a)**  
824 Cropping of datasets is done in a semi-automatic way: selected object of interest is fitted with  
825 an orange (best fit for each particular timepoint) and a global red bounding boxes, which can  
826 be corrected in 3D. **b)** Nuclei and cell segmentation strategies. Upper row: denoised and  
827 deconvolved input data together with seeds from respective tracking are used as input into  
828 the network to predict nuclei volume. The network is trained with both complete and partial  
829 annotations. Lower row: Cell volume prediction follows similar input as for nuclei. Main  
830 difference is that this second network is trained with supervision of complete manual  
831 annotations of lumen and organoid along with the previously done nuclei predictions  
832 themselves. **c)** Strategy for prediction of lineage trees. Track predictions are done with each  
833 consecutive pair of frames. Each pair of frames enter the neural network and produce both  
834 the timepoint in question and a linking frame which is used to connect to the next timepoint

835 via overlap match. Linking itself is done via joint segmentation. **d)** Example of predicted and  
836 corrected tree from a budding organoid dataset with the recording starting from two cells  
837 (recording 006).  
838



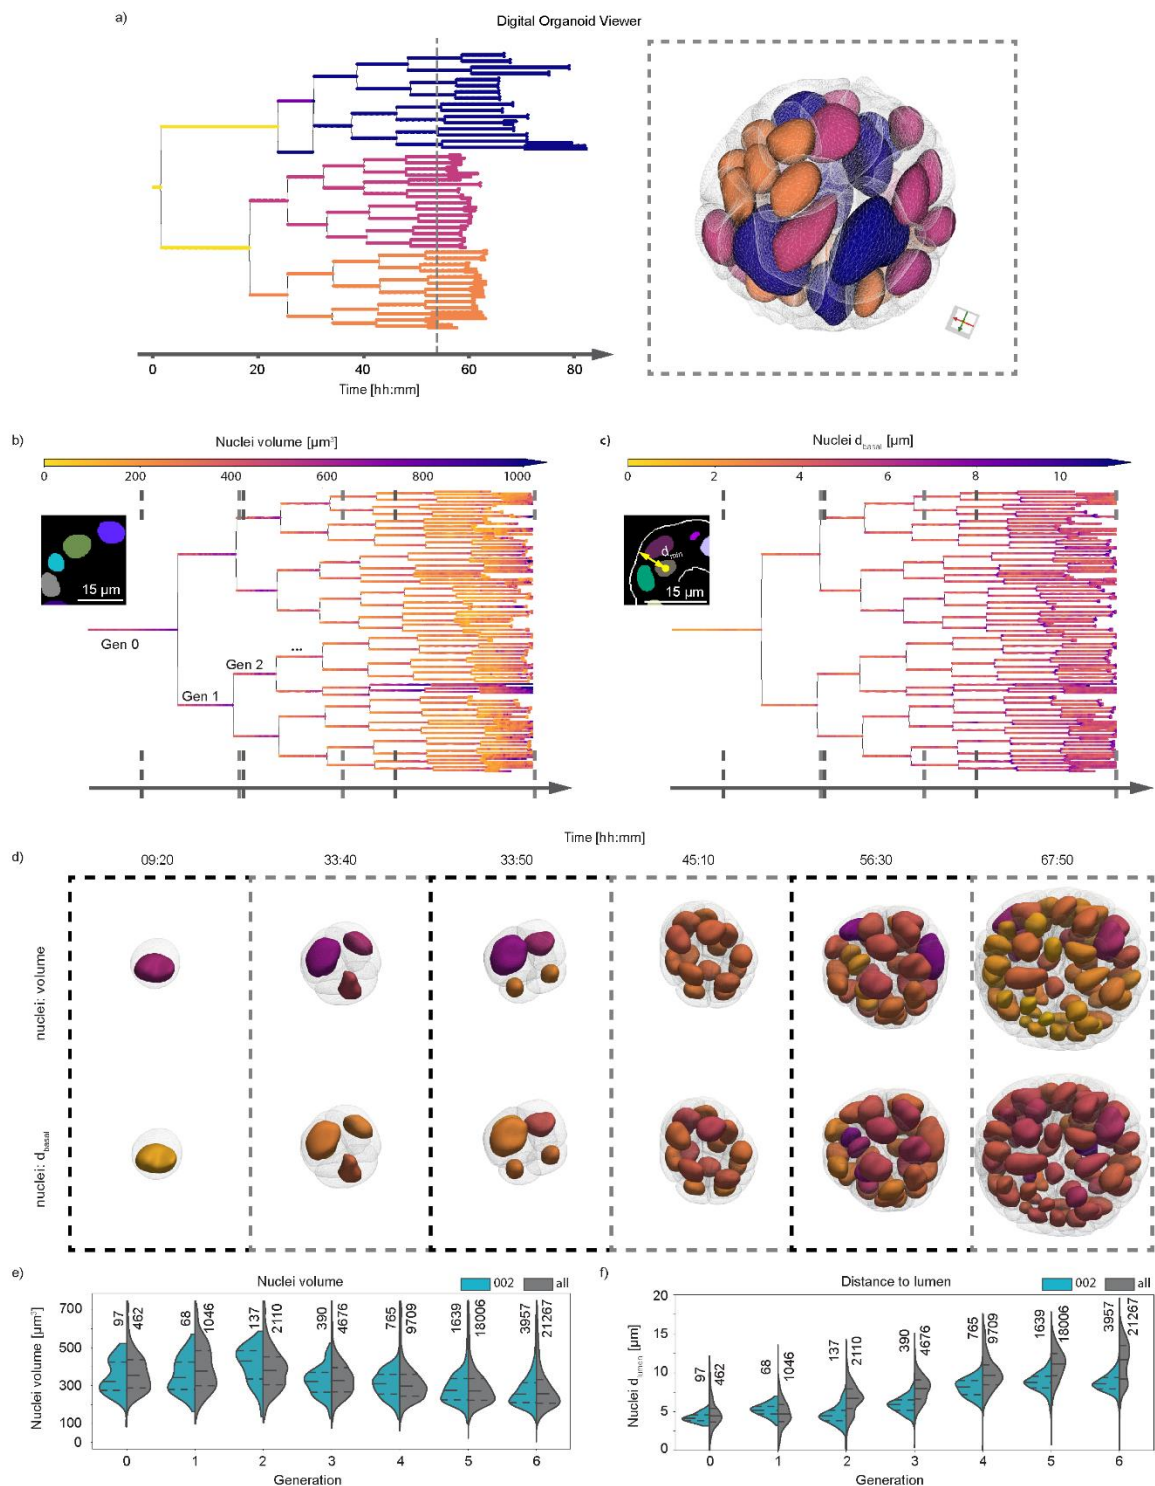

839  
840  
841  
842  
843  
844  
845  
846  
847  
848

**Figure 3: Digital Organoid Viewer.** a) Digital organoid viewer is a web-based tool that shows both lineage trees (left) and respective segmented nuclei and cell meshes (right) simultaneously. Color coding of each data representation can be done in a combined or complementary manner. Here depicted is a color coding based on generation 2, with each of the four cells acquiring different colors being propagated further in time. b) Overlay of the nuclei segmentation as predicted in onto the lineage tree. c) Overlay of distance to basal membrane onto the lineage tree. d) Visualization of the calculated meshes from nuclei and cell segmentations, overlaying the corresponding values (with corresponding color map) of the features presented in b) and c). The time points chosen are shown via dashed lines on

849 each tree in b) and c). **e,f)** Extracted values for nuclei volume (**e**) and for distance to apical  
850 membrane (**f**) of the here exemplified dataset (pull, recording 002) against all datasets (all 7  
851 recordings) analyzed. The dashed lines inside each plot correspond to the first and third  
852 quartile of the values from all of the datasets, with the median as the dashed line in between  
853 them. Each generation spans over the full cell cycle of all nuclei considered, and all nuclei  
854 corresponding to each plot are shown slightly above each violinplot. Source data are provided  
855 as a Source Data file.  
856

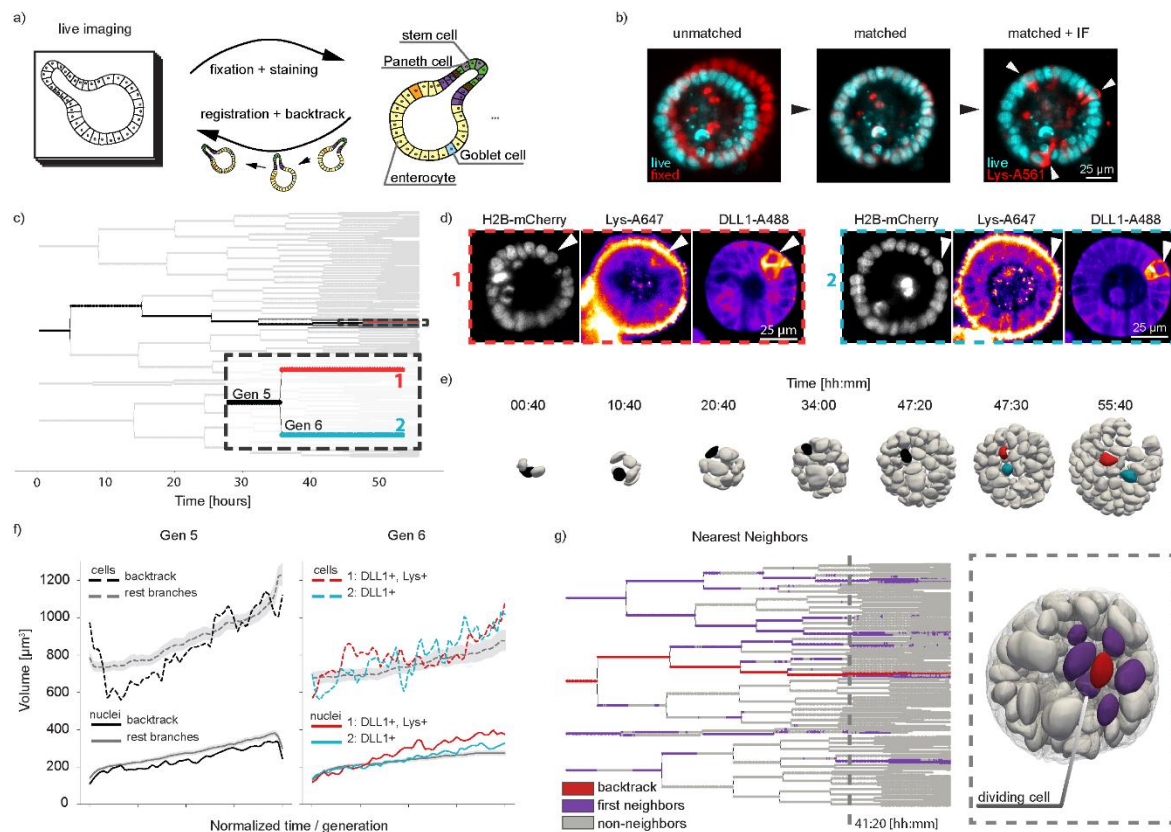

857

858 **Figure 4: Fixation and backtracking after live-imaging.** **a)** Fixation and backtracking strategy  
 859 for light-sheet imaging of organoid growth (shown recording 007). **b)** After fixation a  
 860 registration step may be needed to overlap the fixed nuclei with the nuclei as shown in the  
 861 last timepoint of the timelapse. Left: midplane of raw data from last time-point H2B-mCherry  
 862 recording (cyan) against same plane after fixation (red). Center: registration maps the fixed  
 863 volume into the last time-point volume. Although overlap is not perfect, it is sufficient to map  
 864 each nucleus back. Right: After registration additional information from immunolabelling can  
 865 be overlaid onto last time-point of the live recording, and so cells of interest can be  
 866 backtracked. A total of 4 different experiments were performed with similar results. **c)**  
 867 Lineage tree depicting the backtracking of two sister cells. **d)** After fixation, staining for DLL1  
 868 and Lysozyme shows two cells expressing these markers. Backtracking of them is shown in a).  
 869 **e)** Nuclei volume distribution for the backtracked cells against all other cells per generation.  
 870 **f)** Evaluation of nuclei and cell volumes for the backtracked cells against all other cells during  
 871 generations 5 and 6, as depicted in c). For all other cells, the midline corresponds to the mean,  
 872 whereas the gray region is the standard distribution. **g)** Nearest neighbor evaluation of the  
 873 backtracked Lys+ cell (red). All nearest neighbors are depicted in magenta, with all remaining  
 874 cells in gray. Dashed line on the lineage tree is presented as corresponding segmented meshes  
 875 on the right. A dividing cell can be recognized by the interkinetic movement of its nucleus  
 876 further apically. Source data are provided as a Source Data file.

877

878

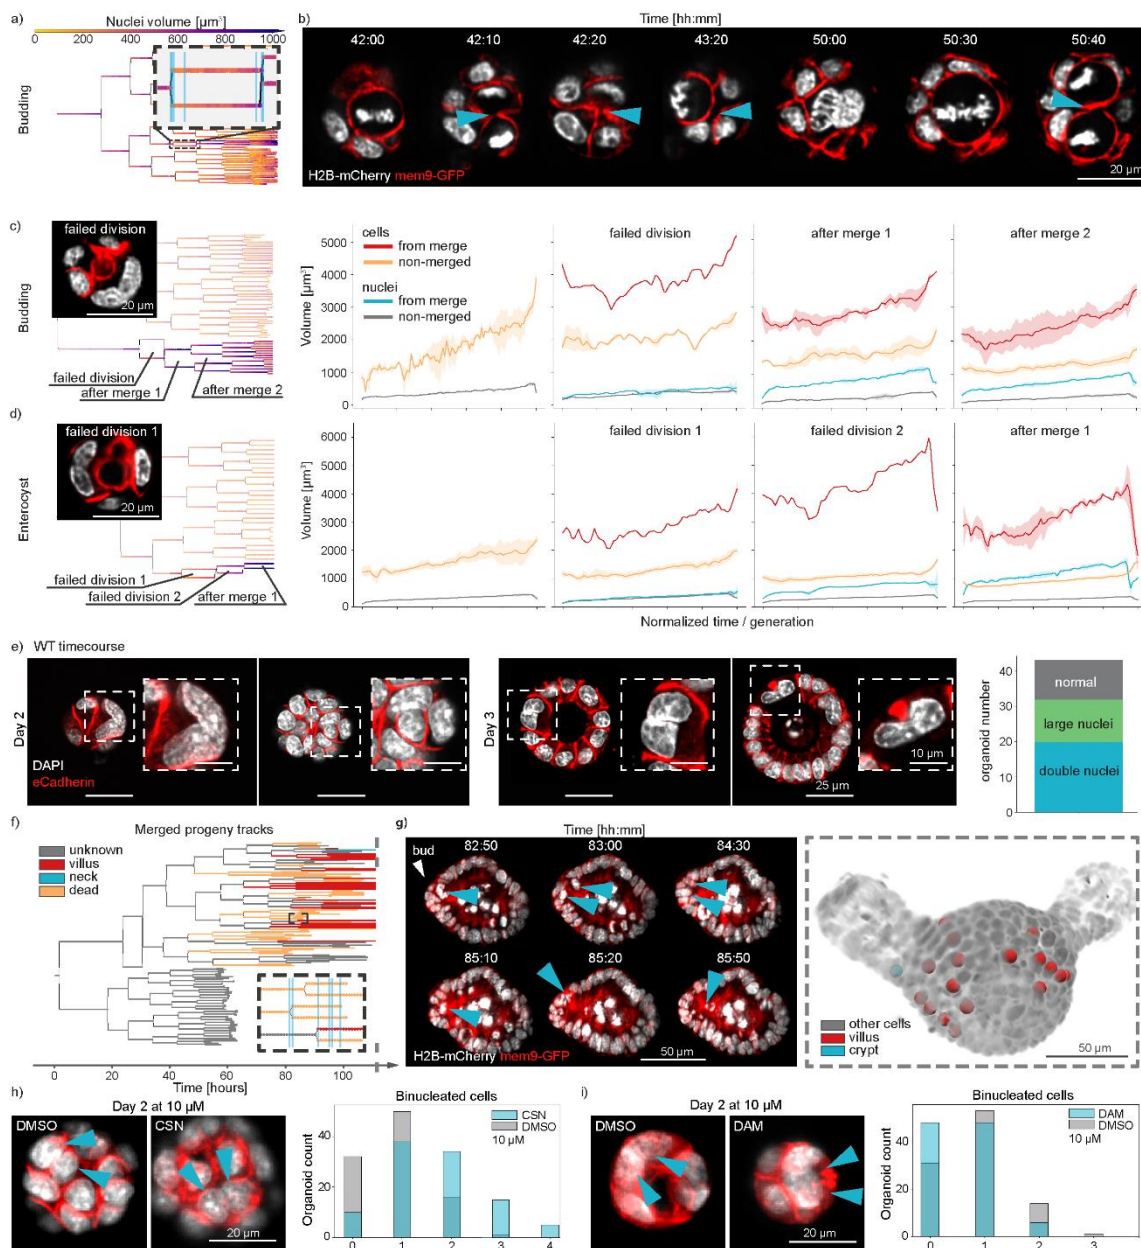

879

880 **Figure 5: Merging events during early organoid growth.** **a)** Example lineage tree with  
 881 highlighted insert depicting a cell division where two nuclei divide again into two nuclei  
 882 (recording 002). **b)** Still images of the light-sheet recording related to the dataset in **a)**. Cyan  
 883 arrows mark the position of a connecting region between the two nuclei until the following  
 884 division occurs, where cytokinesis is successful. Corresponding locations for each depicted  
 885 timepoint on the lineage tree are shown as cyan lines in the insert in **a)**. **c,d)** Examples of  
 886 different sequence of events following a failed division during budding organoid (recording  
 887 001) and enterocyst (recording 003) growth (left), with quantified nuclei and cell volumes for  
 888 the highlighted events on the trees (right). Whenever more than one track is being evaluated  
 889 for the same label, the full line represents the mean whereas the shaded region corresponds  
 890 to 95% of the confidence interval. **e)** Timecourse data on wild-type intestinal organoids grown  
 891 from single cells and fixed at days 2 and 3 after seeding. Staining with DAPI and e-Cadherin  
 892 show binucleated cells and cells with large nuclei. Major axis length of all nuclei after a failed  
 893 division (green) and all other cells (gray) shown on the right. **f)** Typical outcome of progeny

894 from a failed division; *dead* tracks end with nuclei inside the lumen or basally extruded,  
895 unknown corresponds to tracks where the high level of cell packing and/or the low quality of  
896 the images made it impossible to continue and know their fate, and *alive* corresponds to  
897 tracks where the cells are still part of the epithelium until the end of the recording. **g)** Left:  
898 still images depicting timepoints highlighted in the inset in f), with nuclei ending in the lumen.  
899 Right: overlay of tracked cells from left panel onto the last time-point of the recording,  
900 showing the spatial organization of the cells in the crypt and vilus regions (recording 001). **h,i,**  
901 **left panel)** Example images of binucleated cells for both control and compound treated  
902 organoids, with nuclei highlighted via the arrows. **h,i, right panel)** Organoid count with  
903 specific number of binucleated cells for control (DMSO) and compound treated cases. 200  
904 organoids have been randomly selected for evaluation on each case. Source data are provided  
905 as a Source Data file.  
906
